# Supplementary material for: BaGa4O7, a new A3BC10O20 crystalline phase: synthesis, structural determination and luminescence properties
Source: Royal Society of Chemistry journal article supplement (doi:10.1039/c5ce01101a), 2015-01-01
Supplement: c5ce01101a1.pdf [file c5ce01101a1.pdf]

### Electronic Supplementary Information

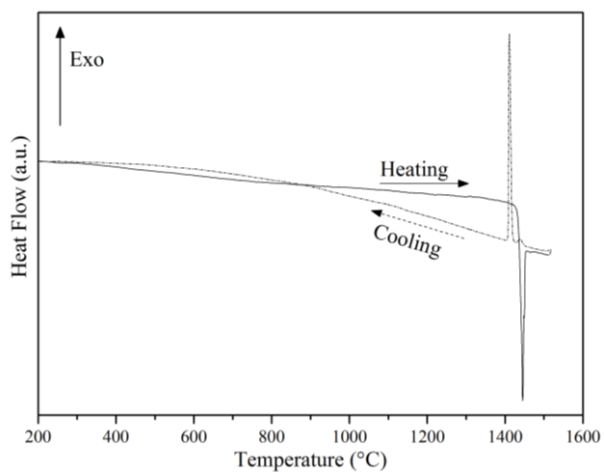

**Fig S1 1:** Differential Thermal Analysis data obtained from the  $\text{BaGa}_4\text{O}_7$  crystalline phase. No phase transition or decomposition could be observed up to the melting point at  $1440^\circ\text{C}$ . Upon cooling, only the new  $\text{BaGa}_4\text{O}_7$  phase crystallizes
